# Supplementary material
Source: Springer Nature journal article supplement (https://www.springermedizin.de/resource/supplementary/12936_2006_311_MOESM1_ESM.pdf/9547644)

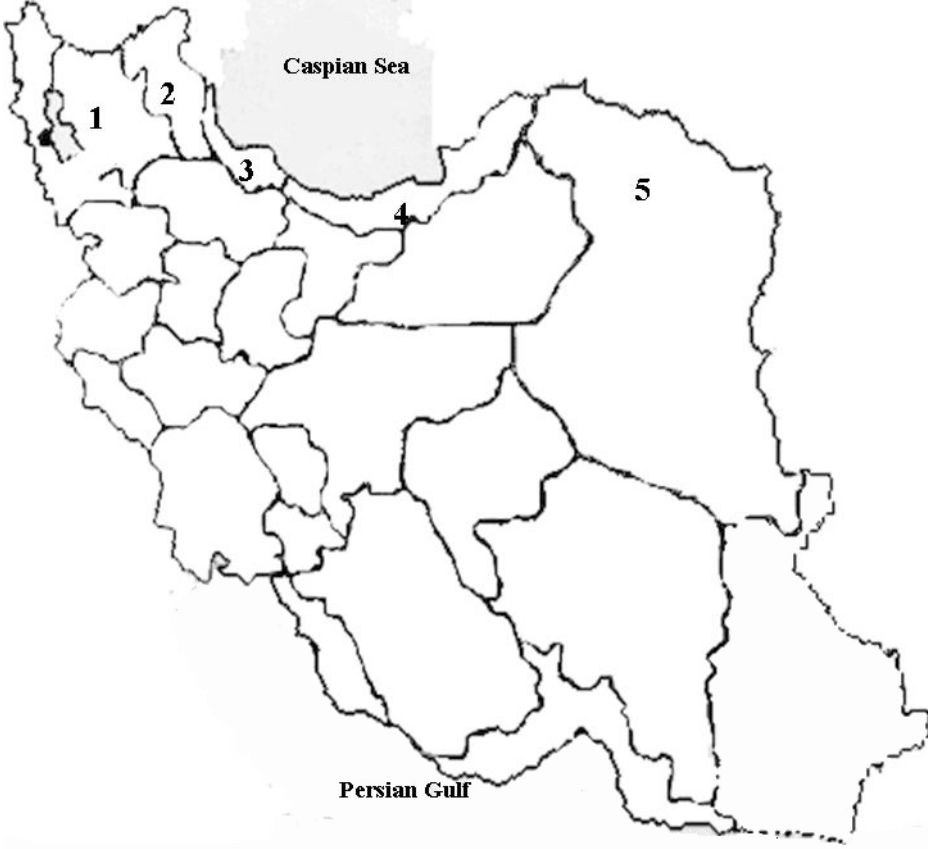

Caspian Sea

1

2

3

4

5

Persian Gulf

Supplement: MOESM1 [file 9547644]
